# Supplementary material
Source: PubMed Central journal article supplement (PMC2820177)
Supplement: mmc1.pdf [file mmc1.pdf]

## Supplemental Data

Ribosomal Protein Genes *RPS10* and *RPS26*

## Are Commonly Mutated in Diamond-Blackfan Anemia

Leana Doherty, Mee Rie Sheen, Adrianna Vlachos, Valerie Choessel, Marie-Françoise O'Donohue, Catherine Clinton, Hal E. Schneider, Colin A. Sieff, Peter E. Newburger, Sarah E. Ball, Edyta Niewiadomska, Michal Matysiak, Bertil Glader, Robert J. Arceci, Jason E. Farrar, Eva Atsidaftos, Jeffrey M. Lipton, Pierre-Emmanuel Gleizes, and Hanna T. Gazda

Table S1. Primers Used for *RPS10*, *RPS26*, and *RPL9* Sequencing

| Gene   | Exon      | Forward Primer        | Reverse Primer         |
|--------|-----------|-----------------------|------------------------|
| RPS10  | Exon 2    | tctgccgaatctgttttgg   | ttaggggaagatccctccat   |
|        | Exon 3    | ctggagactgcctaggatga  | gccatgggacaaaggttcta   |
|        | Exon 4    | aaggagtctctgtccccatt  | cagctgttctgatgctctgc   |
|        | Exon 5    | cggagtgggtactggctttt  | aaaaagtgggaggagggaac   |
|        | Exon 6    | cagctctctcccagctgttt  | acgccaagccaagtacag     |
|        | RPL26     | Exon 1                | tgtccctctctggcctctaa   |
| Exon 2 |           | atttgcggagaacaggaga   | tgggcgaaggctttaagata   |
| Exon 3 |           | gctcaggtattgggctgaac  | ctgaccctccaggatgaaat   |
| Exon 4 |           | ctcctccactctatcagc    | gtgtgtcacttcacacttggtc |
| RPL9   | Exons 1-2 | gctgggcctcgtaattctc   | cacctccaacgagcaact     |
|        | Exon 3    | tccagttgaaaacctgtgc   | tcgcttaagaccacagatg    |
|        | Exon 4    | tccgcaaggagctttacagt  | gaagttgggagtgaaaagg    |
|        | Exon 5    | ggtgcatggagttttacatgg | caaagccgctataggagtgaa  |
|        | Exon 6    | ccccttttaggtgttgcttg  | tcaatacacttgcccaggaa   |
